# Supplementary material for: Electrochemical characterization of the pyranose 2-oxidase variant N593C shows a complete loss of the oxidase function with full preservation of substrate (dehydrogenase) activity
Source: Royal Society of Chemistry journal article supplement (doi:10.1039/c6cp06009a), 2016-01-01

## Supporting information

Manuscript ID: CP-ART-08-2016-006009

TITLE: Electrochemical characterization of the pyranose 2-oxidase variant N593C shows a complete loss of the oxidase function with full preservation of substrate (dehydrogenase) activity

SI.1. CVs recorded in anaerobic conditions (in glove box under nitrogen atmosphere and degassed solutions)

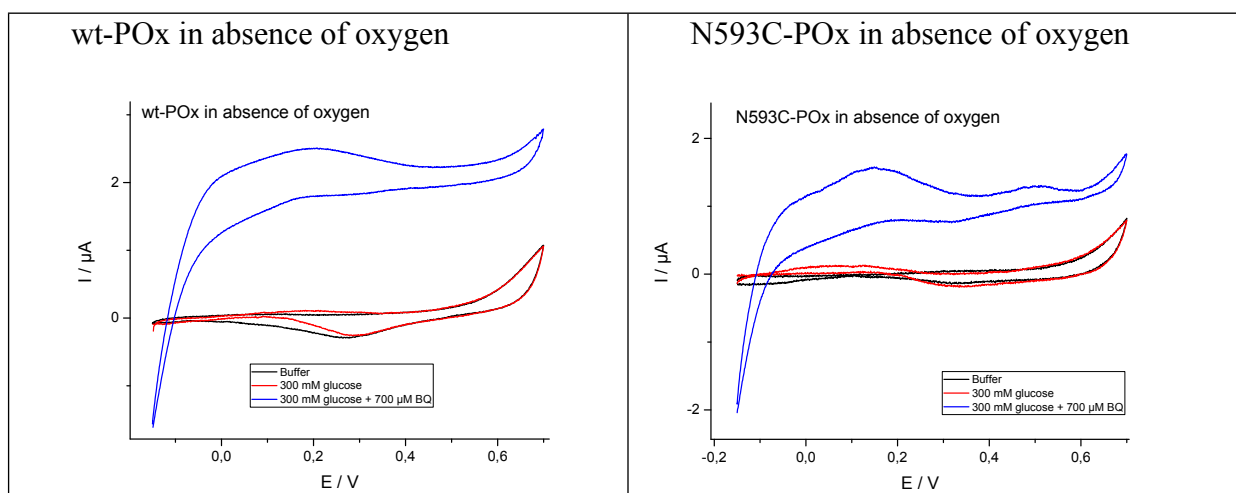

SI-2 Michaelis-Menten curves for glucose in presence of fixed concentration of mediator (1,4-BQ 700  $\mu$ M) and resulting  $K_m$  and  $I_{max}$  for wt-POx, N593C-POx and two other variants at position 593, namely N593K and N593S.

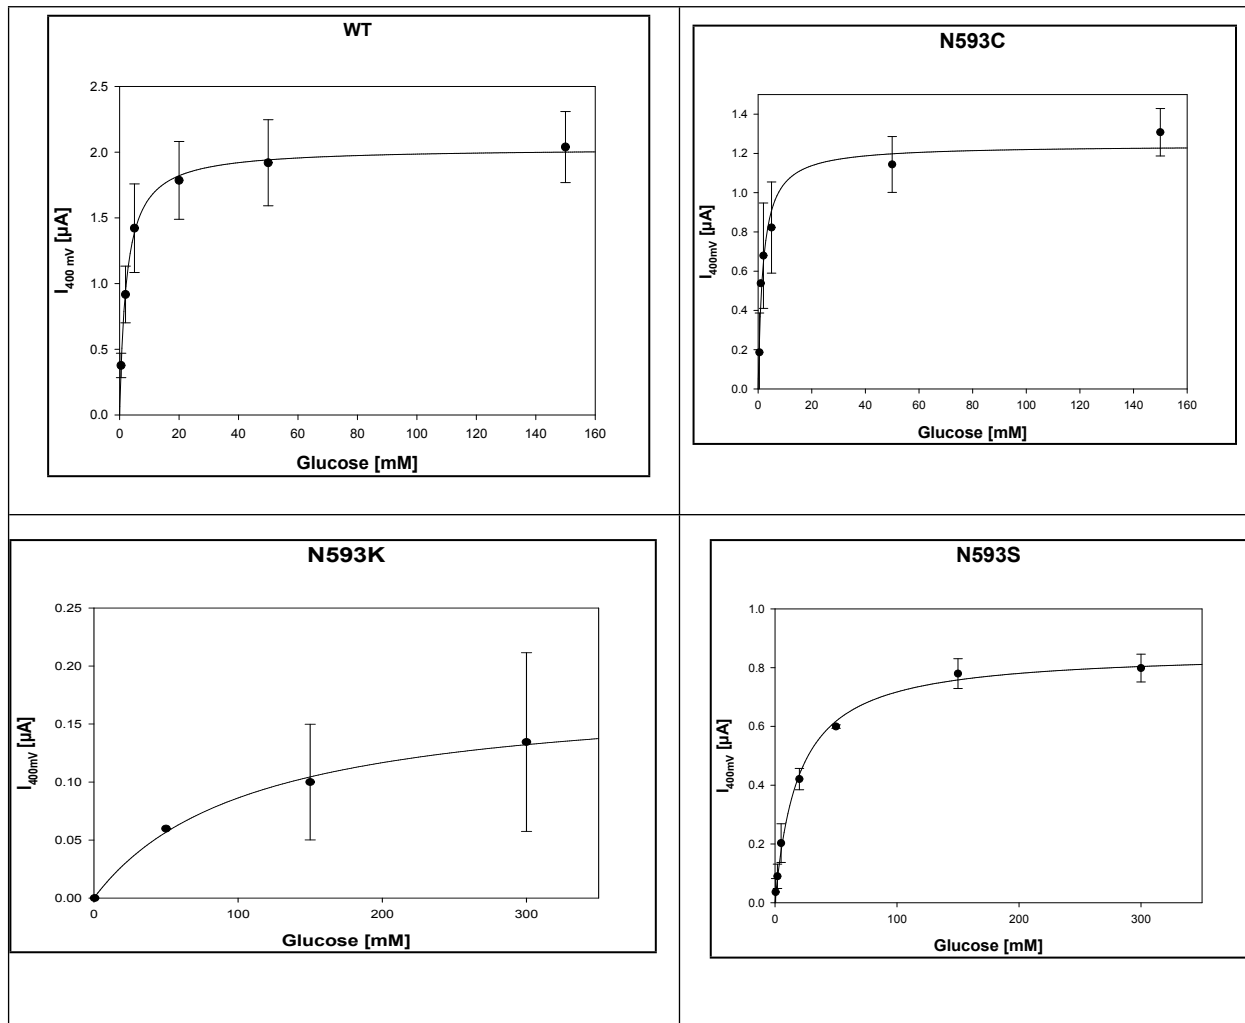

SI-3 Absence of oxygen as an interference is visible also in the linearity/dependency for N593C-POx variant of the resulting currents obtained at constant concentrations of glucose (300 mM glucose) and variable concentrations of BQ.

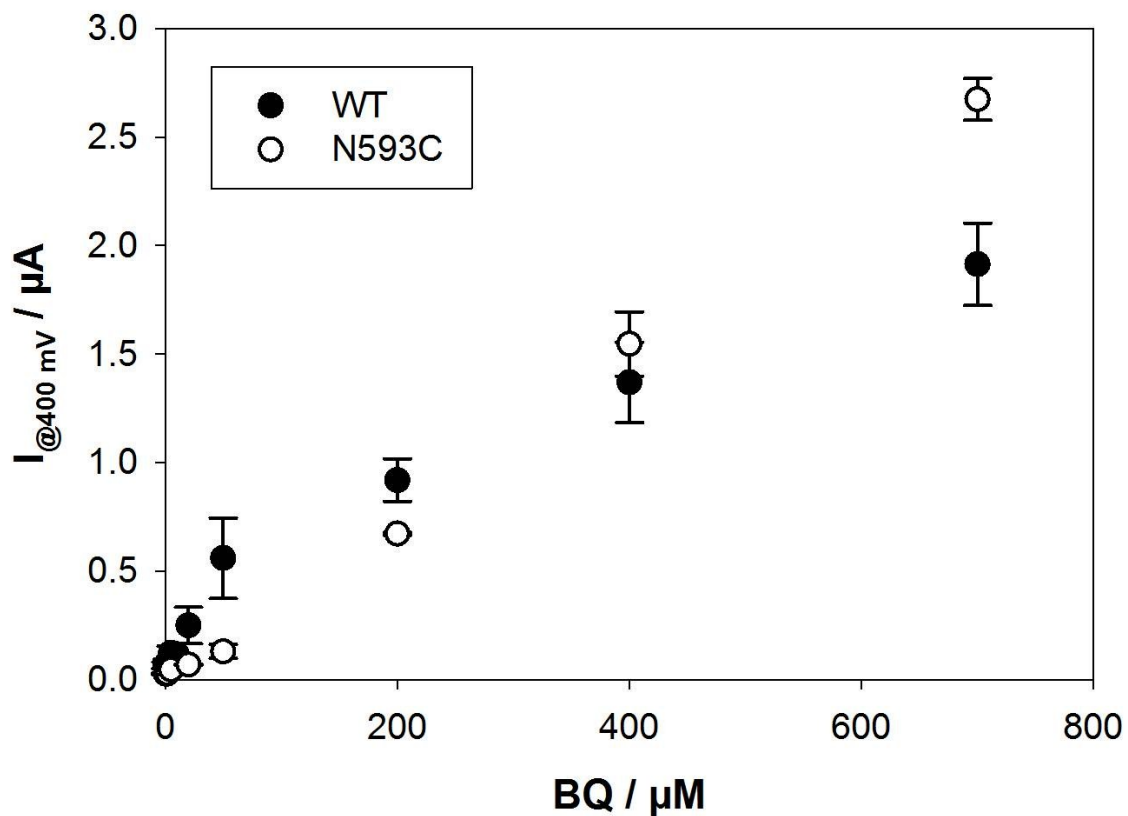

SI-4 Denaturation/Inhibition of enzyme: Treatment of enzyme modified electrodes for 1 h at 70°C (blue CV-in buffer; orange CV-in 300 mM glucose; green CV- in 300 mM glucose and 700  $\mu$ M BQ).

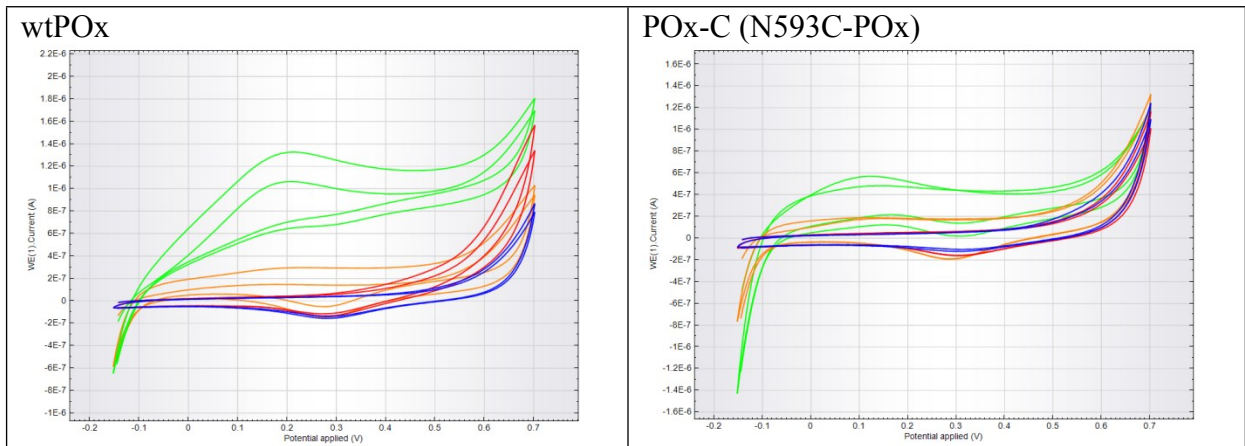

Supplement: c6cp06009a1.pdf [file c6cp06009a1.pdf]
